# Supplementary material for: Mycobacterium bovis Requires P27 (LprG) To Arrest Phagosome Maturation and Replicate within Bovine Macrophages
Source: PubMed Central journal article supplement (PMC5328499; doi:10.1128/iai.00720-16), 2017-02-23
Supplement: IAI.00720-16_zii999091974s1.pdf [file IAI.00720-16_zii999091974s1.pdf]

## Supplementary Figure 1

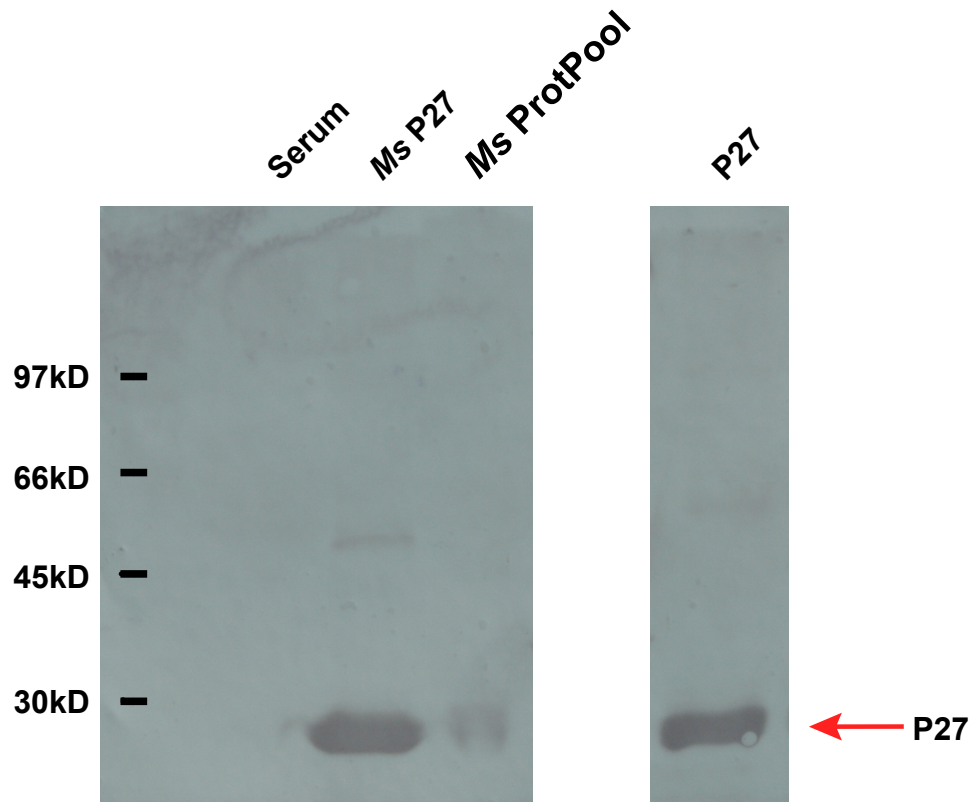

Supp. Figure 1: Detection of P27 protein coated to polystyrene beads. Image shows the immunoblots from the polystyrene beads coated with bovine serum proteins (Serum), a pool of proteins of *M. smegmatis* (Ms ProtPool) or P27 protein of *M. smegmatis* (Ms P27). Adsorption of P27 to the polystyrene beads was detected using polyclonal anti-P27 antibody.
