# Supplementary material for: Mycobacterium bovis Requires P27 (LprG) To Arrest Phagosome Maturation and Replicate within Bovine Macrophages
Source: PubMed Central journal article supplement (PMC5328499; doi:10.1128/iai.00720-16), 2017-02-23
Supplement: IAI.00720-16_zii999091974s2.pdf [file IAI.00720-16_zii999091974s2.pdf]

## Supplementary Figure 2

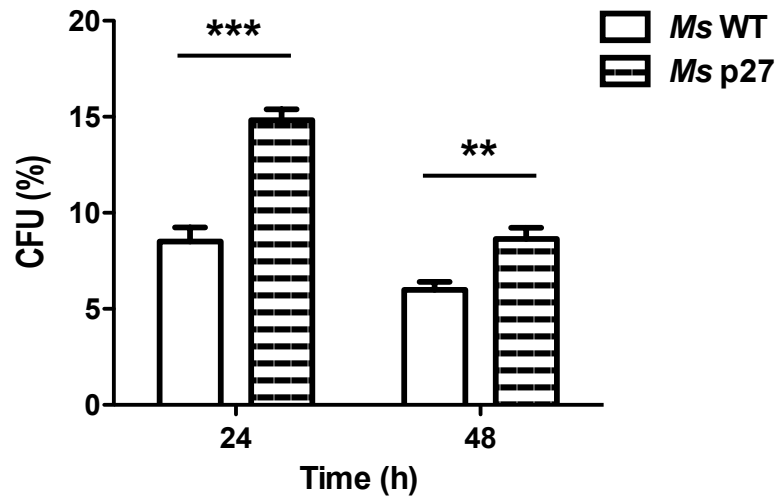

Supp. Figure 2: Survival of *M. smegmatis* wild type and the strain overexpressing P27 in HeLa cells. HeLa cells were infected with *M. smegmatis* wild type and *M. smegmatis* overexpressing P27 (*Ms p27*) for 1 h of uptake, followed by 24 h and 48 h of chase. Then cells were lysed and CFU determined. Data represent the Mean  $\pm$  S.E.M of three independent experiments. Asterisks show significance (\*\*)  $p \leq 0.01$ , (\*\*\*)  $p \leq 0.001$  using two-tailed Student's t-test.
